# Supplementary material for: Medicinal plants used by women from Agnalazaha littoral forest (Southeastern Madagascar)
Source: PubMed Central journal article supplement (PMC3827988; doi:10.1186/1746-4269-9-73), 2013-11-04
Supplement: 1746-4269-9-73-S1.pdf [file 1746-4269-9-73-S1.pdf]

**ADDITIONAL FILE 1  
FICHE D'ENQUETE ETHNOBOTANIQUE**

Date : ..... N° ..... Village : .....

Enquêteur : RAZAFINDRAIBE Nambinintsoa Mendrika

Personne enquêtée : .....

**Questionnaires**

Mettre une croix dans la case que vous estimez convenable.

Prière de répondre de façon précise et honnête.

1. **Age :** A1  A2  A3  A4  A5  A6
2. **Genre :** Masculin  Féminin
3. **Niveau d'étude :** Analphabète  Primaire  Secondaire  Universitaire
4. **Situation familiale :** Célibataire  Marié(e)  Veuf(ve)
5. **Salaire :** Inférieur à 80 000 Ar  80 000 Ar  Supérieur à 80 000 Ar
6. **Quand vous vous sentez malade, vous vous adressez :**  
A la médecine traditionnelle  , pourquoi ? efficace  moins chère   
acquisition  médicament inefficace   
A la médecine moderne  , pourquoi ? efficace  plus précise  toxicité des plantes   
Si c'est les deux, quelle est la première ? médecine moderne  médecine traditionnelle
7. **Concernant les résultats des soins :**  
Guérison  Amélioration  Intoxication   
Evolution de la maladie  Effets secondaires
8. **Utilisez vous des plantes avec des doses précises :** oui  non
9. **Lorsque vous voulez utiliser une plante, vous vous adressez aux :**  
Expériences des autres  Guérisseurs
10. **Connaissez vous des plantes toxiques de la région / utilisées en médecine traditionnelle?**  
(Lesquelles ?) .....

**11. Type de maladie :**

1. Appareil respiratoire 2. Appareil digestif 3. Appareil circulatoire 4. Appareil génital  
5. Maladies de la peau 6. Système nerveux 7. Appareil auditif 8. Appareil visuel

**12. Partie utilisée :**

1. Partie souterraine 2. Ecorce 3. Feuilles 4. Bourgeons  
5. Fleurs 6. Fruits 7. Plante entière

**13. Mode de préparation :**

1. Décoction 2. Fumigation 3. Infusion 4. Macération 5. Inhalation  
6. Poudrage 7. Poudrage 8. Cataplasme 9. Goutte

**14. Lieu de prélèvement :**

1. Forêt 2. Marécage 3. Savane 4. Savoka 5. Rivière 6. Culture 7. Village

**15. Récapitulatif**

| Espèce végétale | Type de maladie | Partie utilisée | Mode de préparation | Lieu de prélèvement |
|-----------------|-----------------|-----------------|---------------------|---------------------|
|                 |                 |                 |                     |                     |
|                 |                 |                 |                     |                     |
|                 |                 |                 |                     |                     |
